# Supplementary material for: Prognostic impact of nomogram based on whole tumour size, tumour disappearance ratio on CT and SUVmax on PET in lung adenocarcinoma
Source: Springer Nature journal article supplement (doi:10.1007/s00330-015-4029-0), 2015-10-11
Supplement: MOESM4 [file 8322962]

**Supplementary Table 1** Distribution of patients according to solid and whole tumor sizes

|  |  | **Whole tumor size, cm** | | | |  |
| --- | --- | --- | --- | --- | --- | --- |
|  |  | ≤ 2 | >2 to 3 | >3 to 5 | >5 | Total |
| **Solid tumor size, cm** | ≤ 2 | 254 | 126 | 9 | 0 | 389 |
| >2 to 3 | 0 | 90 | 43 | 1 | 134 |
| >3 to 5 | 0 | 0 | 55 | 9 | 64 |
| > 5 | 0 | 0 | 0 | 8 | 8 |
| **Total** |  | 254 | 216 | 107 | 18 | 595 |
